# Supplementary material
Source: PubMed Central journal article supplement (PMC8378827)
Supplement: NIHMS1714183-supplement-1.pdf [file NIHMS1714183-supplement-1.pdf]

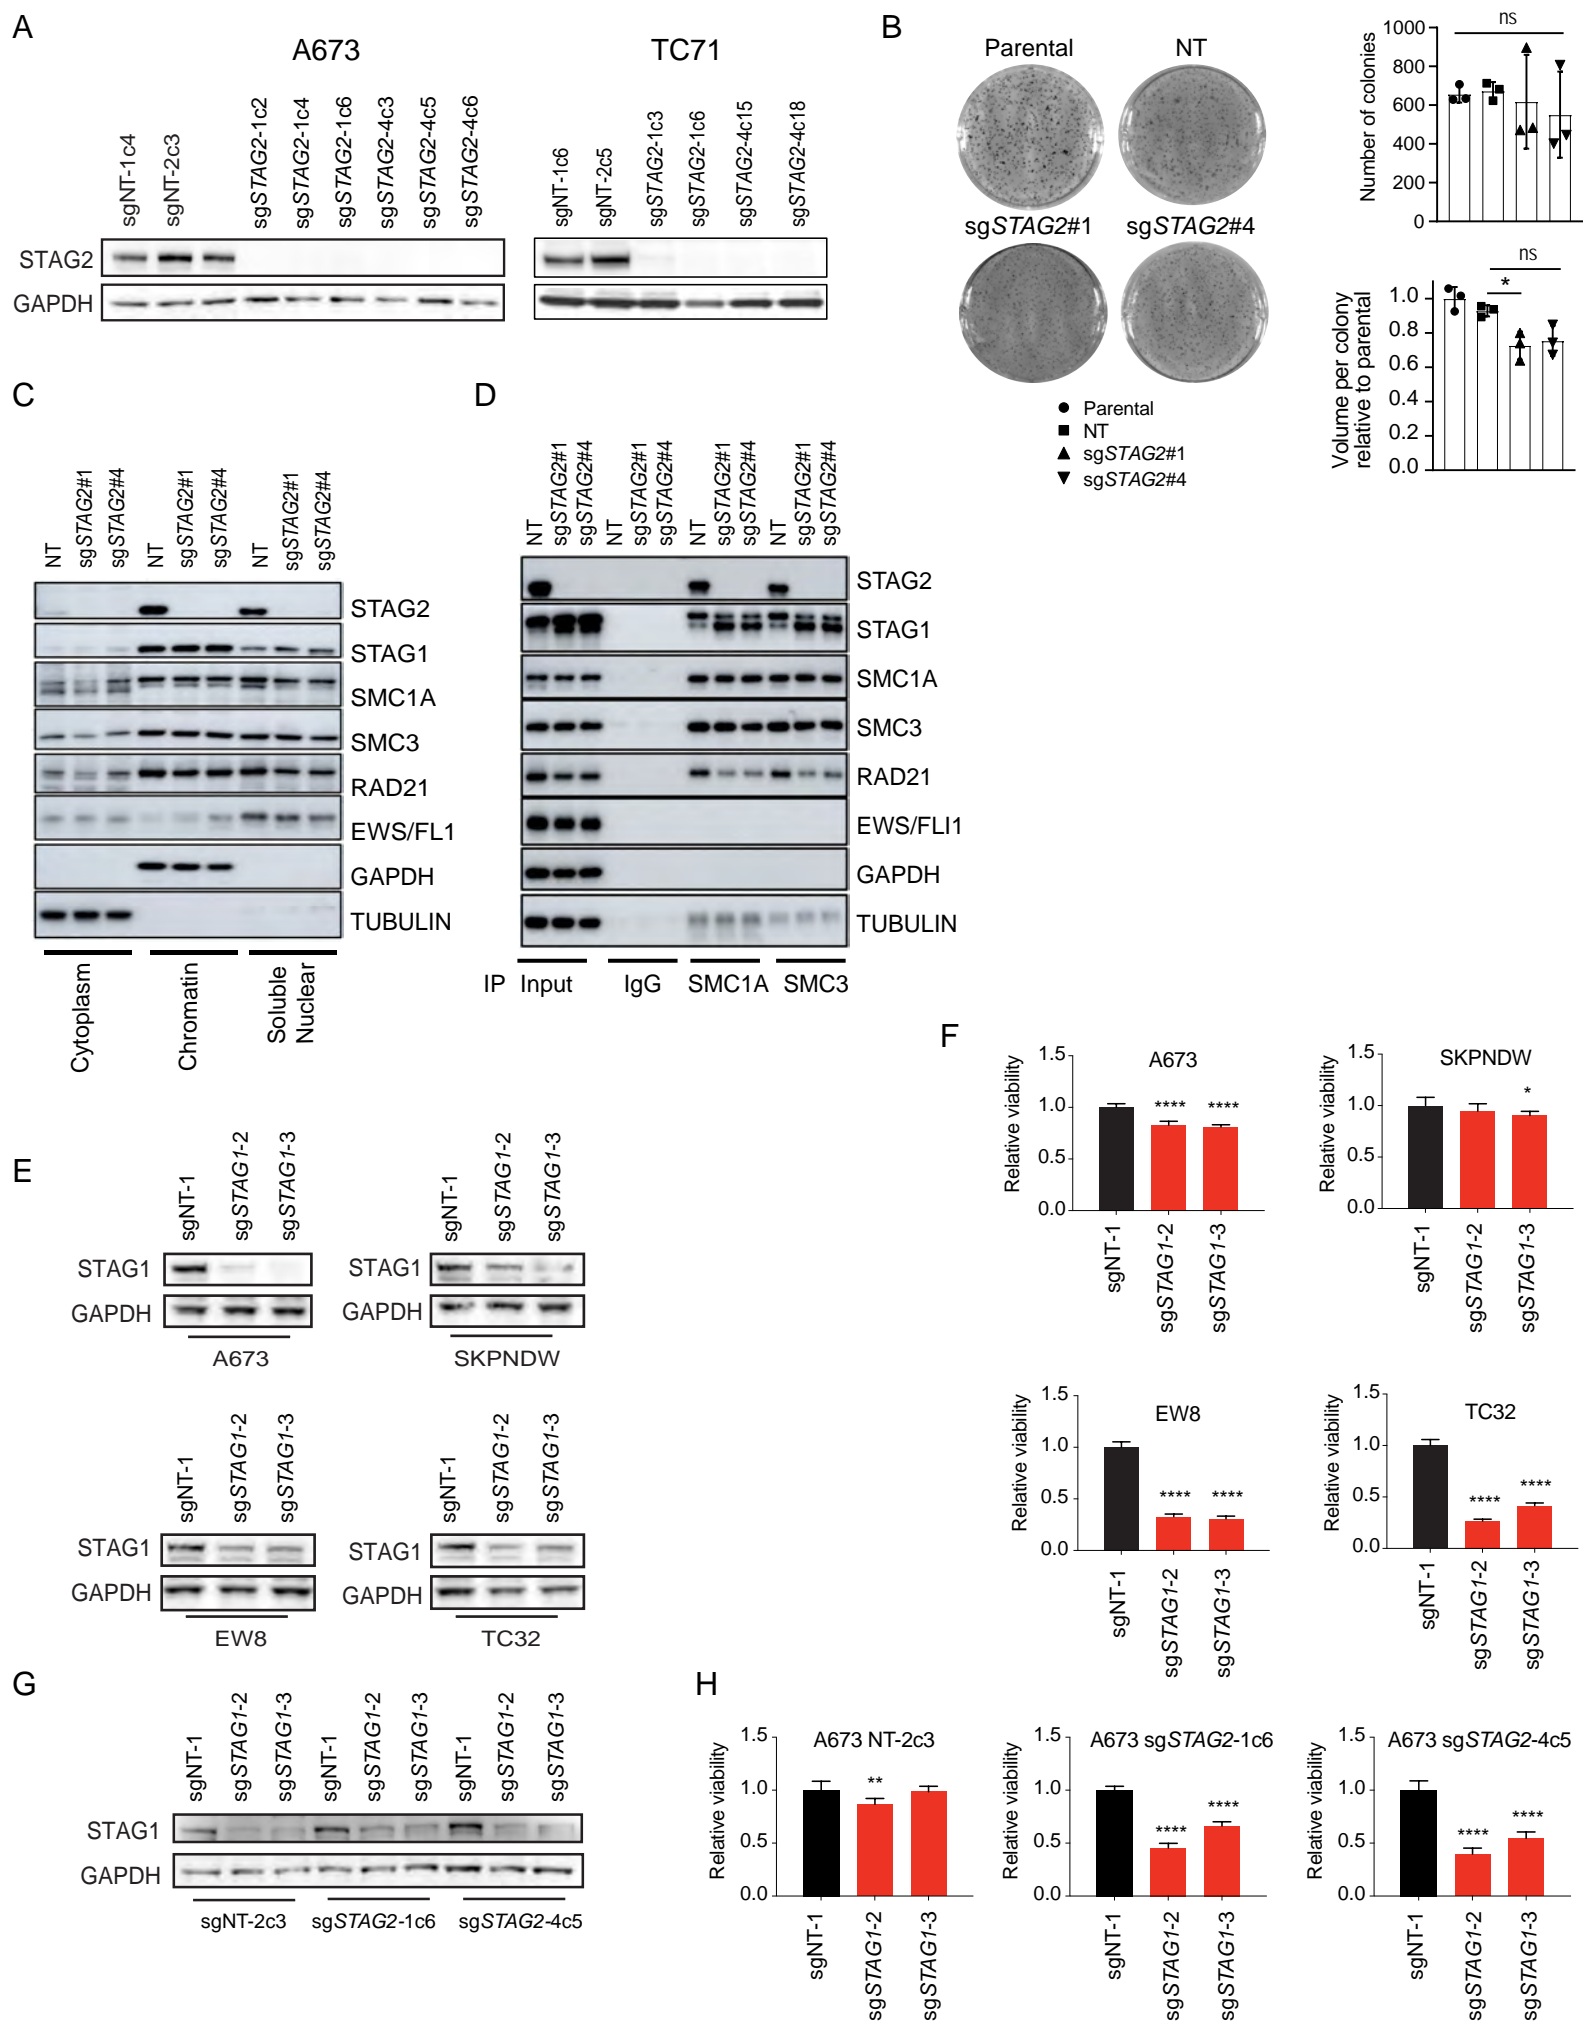

**Figure S1. Loss of *STAG2* does not dramatically alter cell proliferation but changes the composition of the cohesin complex and renders cells sensitive to *STAG1* deletion, related to Figure 1.**

(A) Western blot showing the expression levels of *STAG2* in clonally selected A673 (left) and TC71 (right). GAPDH is used as a loading control.

(B) TC71 cells were plated in methylcellulose media for 14 days. Shown are mean  $\pm$  standard deviation barplots for the number of colonies (top) and for the volume per colony relative to parental (bottom). One-way ANOVA Tukey's multiple comparisons test, ns = not significant, \*  $P < 0.05$ .

(C) Cell fractionation followed by western blot was performed on the lysates from the indicated cellular compartments in clonally selected control and *STAG2* KO TC71 cells.

(D) Immunoprecipitation was performed on whole cell lysates using bead conjugated antibodies against either SMC1A, SMC3 or IgG in control and *STAG2* KO TC71 cells. Total proteins pulled down with the antibodies were recovered and immunoblotted for the indicated proteins.

(E) Polyclonal *STAG1* KO cells were generated via CRISPR/Cas9 mediated editing in two *STAG2* WT (A673 & SKPNDW) and *STAG2* mutant (TC32 & EW8) Ewing cell lines. Western blot shows the levels of *STAG1* in each cell line. GAPDH is used as a loading control.

(F) Short-term cell viability assays were performed using CellTiter-Glo in control and *STAG1* KO cells described in Figure S1E. Bar graphs represent mean and standard deviation, Student t-test, \*  $P < 0.05$ , \*\*\*\*  $P < 0.0001$ .

(G) Polyclonal *STAG1* KO cells were generated via CRISPR/Cas9 mediated editing in clonally selected control (NT) and two independent *STAG2* KO A673 cells. Western blot shows the levels of *STAG1* in each cell line. GAPDH is used as a loading control.

(H) Short-term cell proliferation assays were performed using CellTiter-Glo in control and *STAG1* KO cells described in Figure S1G. Bar graphs represent mean and standard deviation, Student t-test, \*\*  $P < 0.01$ , \*\*\*\*  $P < 0.0001$ .

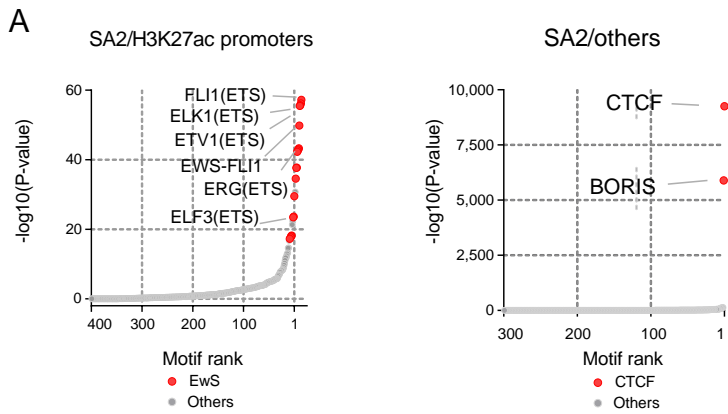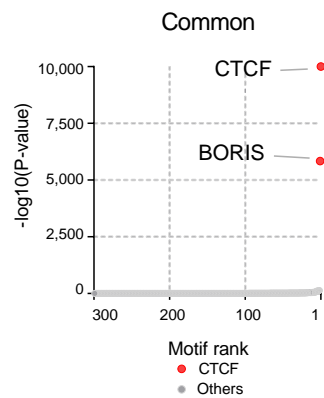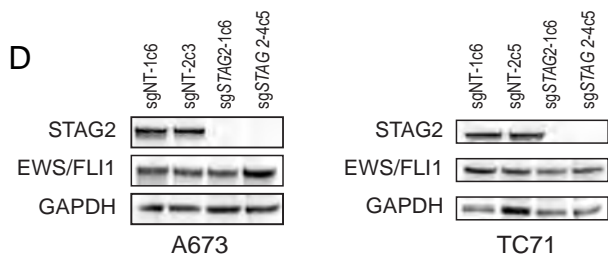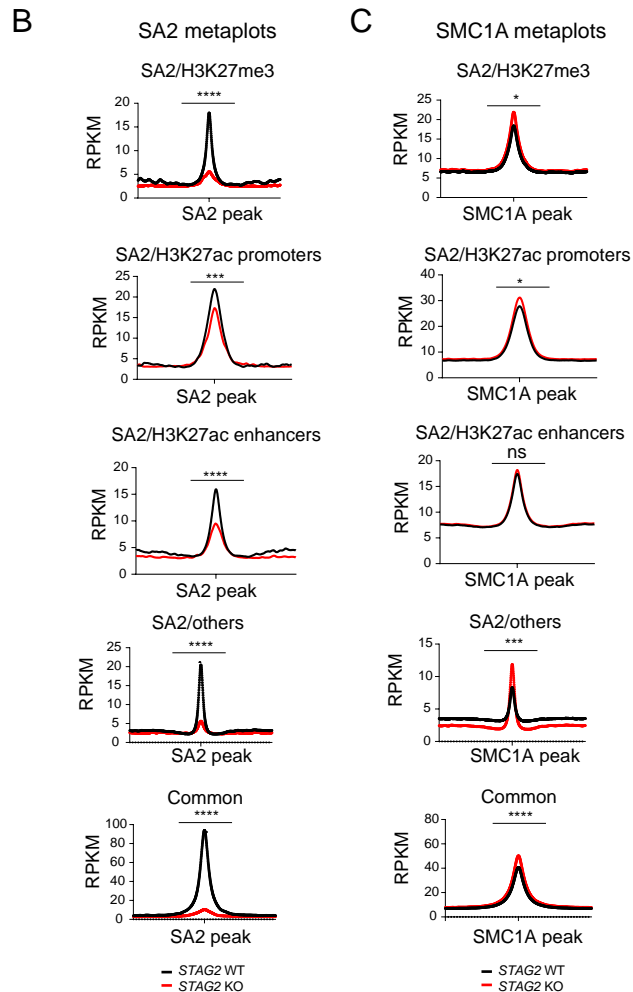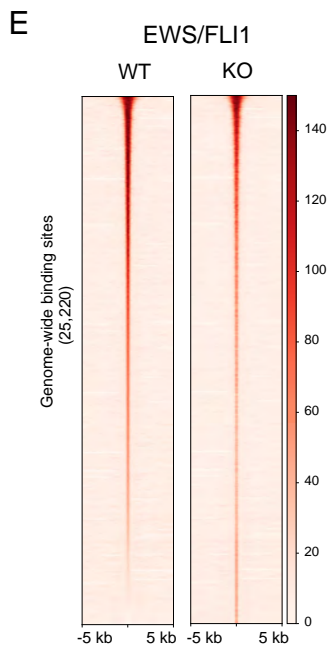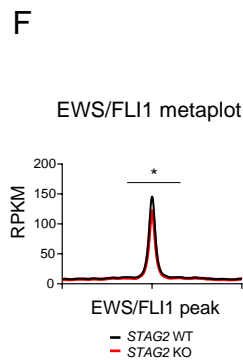

**Figure S2. *STAG2* is enriched at PRC2 and enhancer marked regions and its deletion is incompletely compensated by *STAG1*, related to Figure 2.**

(A) Hockey plots depicting motifs enriched in SA2/H3K27ac promoters, SA2/others and Common regions defined in Figure 2C.

(B)-(C) Metaplots showing average peak centered signal for (B) SA2 and (C) SMC1A in the cohesin regions defined in Figure 2C. Differential read density in *STAG2* KO vs. WT A673 cells based on unpaired t-test with Welch's correction, \*\*\*\*  $P < 0.0001$ , \*\*\*  $P < 0.001$ , \*  $P < 0.05$ , ns = not significant.

(D) Western blot showing the expression levels of EWS/FLI1 in clonally selected control and *STAG2* KO A673 (left) and TC71 (right). GAPDH is used as a loading control.

(E) Genome-wide heatmap depicting EWS/FLI1 peak centered signal in control and *STAG2* KO A673 cells.

(F) Metaplot showing genome-wide average peak centered read density of EWS/FLI1 signal in control and *STAG2* KO A673 cells. Differential read density in KO vs. WT conditions based on unpaired t-test with Welch's correction, \*  $P < 0.05$ .

A

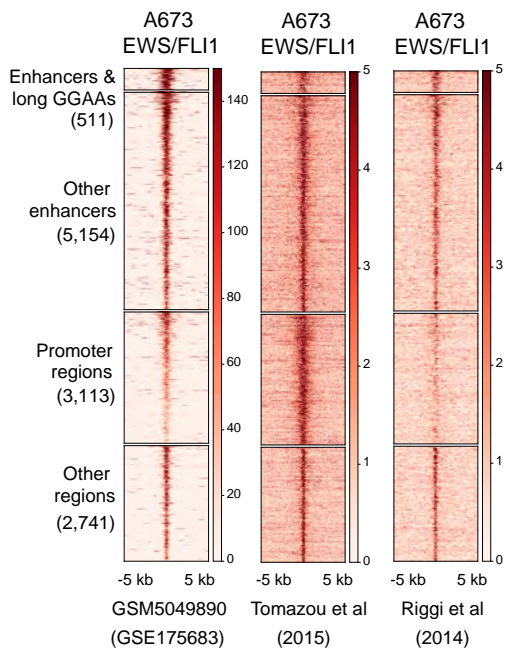

B

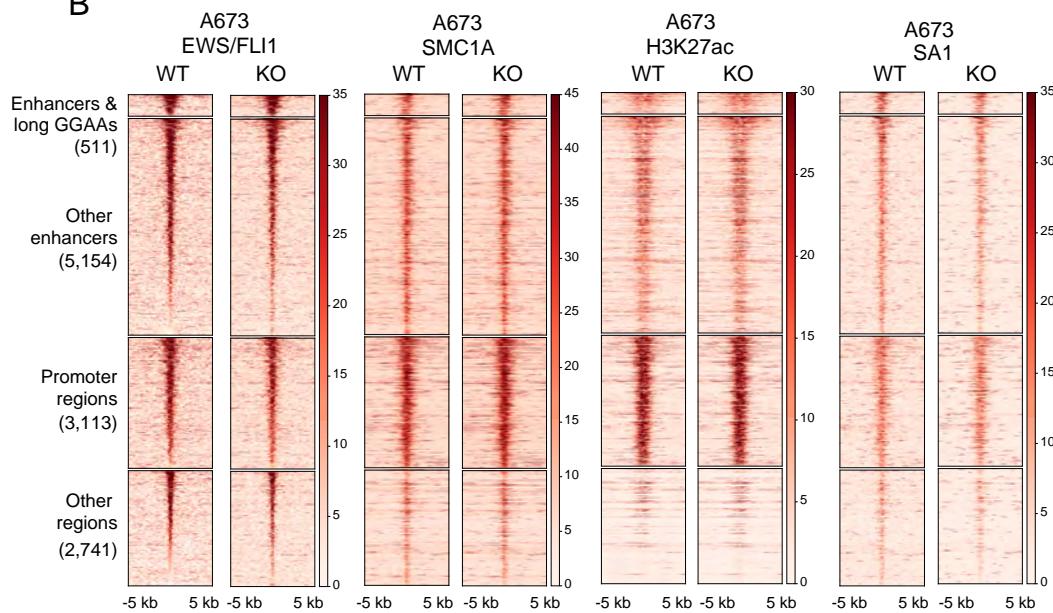

C

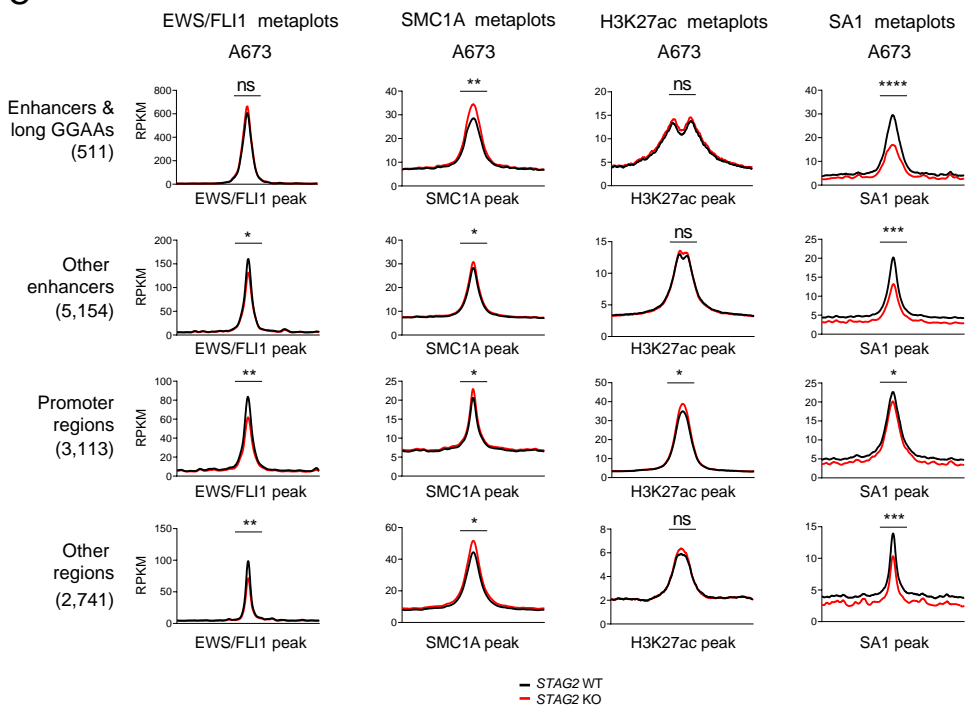

D

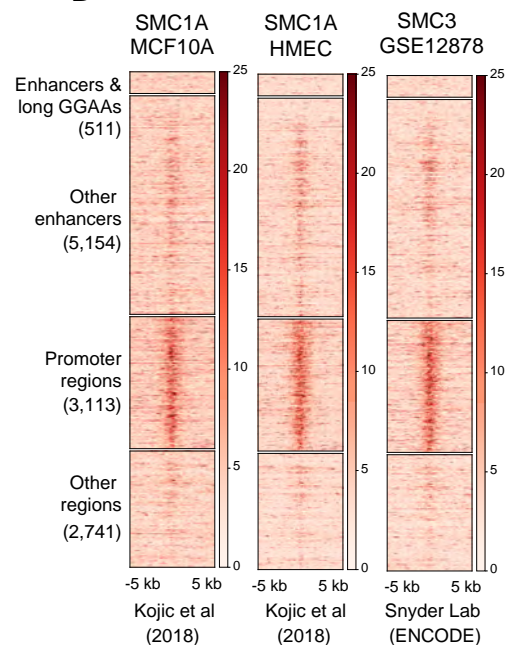

E

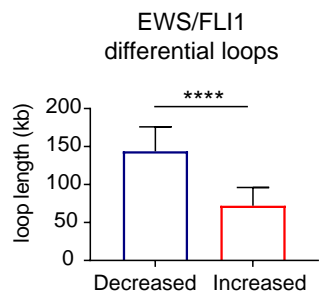

**Figure S3. Loss of *STAG2* alters the frequency of cis-chromatin contacts, related to Figure 3.**

(A) Heatmaps depicting the EWS/FLI1 binding on the high confidence EWS/FLI1 consensus peaks generated from the intersection of 3 independent studies, all in A673 cells: this current study (GEO: GSM5049890), (Riggi et al., 2014; Tomazou et al., 2015) and presented in Table S1. Heatmaps are clustered in four regions defined by EWS/FLI1 peaks in (i) H3K27ac enhancers with long ( $\geq 4$ ) GGAA repeats; (ii) other H3K27ac enhancers (with no long GGAA repeats); (iii) TSS $\pm$ 3kb promoter regions; (iv) other regions.

(B) EWS/FLI1, SMC1A, and H3K27ac in WT and *STAG2* KO signal in A673 cells on the clusters of high confidence EWS/FLI1 consensus peaks shown in Figure S3A.

(C) Read density metaplots showing average RPKM normalized signal for EWS/FLI1, SMC1A, H3K27ac and SA1 in WT (black) and *STAG2* KO (red) A673 cells. Differential read density in KO vs. WT conditions, unpaired t-test with Welch's correction, \*\*\*\* P < 0.0001, ns = not significant.

(D) Clustered heatmaps showing cohesin binding in non-Ewing sarcoma cells in the EWS/FLI1 regions defined in Figure S3A: SMC1A in MCF10 and HMEC cells (Kojic et al., 2018) and SMC3 in GM12878 cells (ENCODE, Snyder Lab).

(E) Median with 95% confidence interval plots for lengths of EWS/FLI1 differential loops with decreased vs. increased contact coverage in *STAG2* KO vs. WT A673 cells. Unpaired t-test with Welch correction, \*\*\*\* P < 0.0001.

**Table S2. Top 30 motifs enriched in enhancers involved in the differential Enhancer-Promoter interactions, related to Figure 3.**

| #  | Motif name                                                   | Consensus sequence   | $-\log_{10}(\text{P-value})$ |
|----|--------------------------------------------------------------|----------------------|------------------------------|
| 1  | Bach2(bZIP)/OCILy7-Bach2-ChIP-Seq(GSE44420)                  | TGCTGAGTCA           | 1.20E+01                     |
| 2  | Jun-AP1(bZIP)/K562-cJun-ChIP-Seq(GSE31477)                   | GATGASTCATCN         | 1.16E+01                     |
| 3  | Nrf2(bZIP)/Lymphoblast-Nrf2-ChIP-Seq(GSE37589)               | HTGCTGAGTCAT         | 1.07E+01                     |
| 4  | Bach1(bZIP)/K562-Bach1-ChIP-Seq(GSE31477)                    | AWWNTGCTGAGTCAT      | 1.06E+01                     |
| 5  | Fosl2(bZIP)/3T3L1-Fosl2-ChIP-Seq(GSE56872)                   | NATGASTCABNN         | 9.54E+00                     |
| 6  | CTCF-SatelliteElement(Zf?)/CD4+-CTCF-ChIP-Seq(Barski_et_al.) | TGCAGTTCCMVNWRTGGCCA | 8.84E+00                     |
| 7  | EWS:FLI1-fusion(ETS)/SK_N_MC-EWS:FLI1-ChIP-Seq(SRA014231)    | VACAGGAAAT           | 8.10E+00                     |
| 8  | Ets1-distal(ETS)/CD4+-PollI-ChIP-Seq(Barski_et_al.)          | MACAGGAAGT           | 7.73E+00                     |
| 9  | NF-E2(bZIP)/K562-NFE2-ChIP-Seq(GSE31477)                     | GATGACTCAGCA         | 6.90E+00                     |
| 10 | ERG(ETS)/VCaP-ERG-ChIP-Seq(GSE14097)                         | ACAGGAAGTG           | 6.89E+00                     |
| 11 | JunB(bZIP)/DendriticCells-Junb-ChIP-Seq(GSE36099)            | RATGASTCAT           | 6.72E+00                     |
| 12 | Rfx6(HTH)/Min6b1-Rfx6.HA-ChIP-Seq(GSE62844)                  | TGTTKCTAGCAACM       | 6.22E+00                     |
| 13 | GABPA(ETS)/Jurkat-GABPa-ChIP-Seq(GSE17954)                   | RACCGGAAGT           | 6.11E+00                     |
| 14 | PAX5(Paired,Homeobox)/GM12878-PAX5-ChIP-Seq(GSE32465)        | GCAGCCAAGCRTGACH     | 6.11E+00                     |
| 15 | Atf3(bZIP)/GBM-ATF3-ChIP-Seq(GSE33912)                       | DATGASTCATHN         | 6.00E+00                     |
| 16 | BATF(bZIP)/Th17-BATF-ChIP-Seq(GSE39756)                      | DATGASTCAT           | 5.93E+00                     |
| 17 | CEBP:AP1(bZIP)/ThioMac-CEBPb-ChIP-Seq(GSE21512)              | DRTGTTGCAA           | 5.91E+00                     |
| 18 | Fra2(bZIP)/Striatum-Fra2-ChIP-Seq(GSE43429)                  | GGATGACTCATC         | 5.86E+00                     |
| 19 | Fra1(bZIP)/BT549-Fra1-ChIP-Seq(GSE46166)                     | NNATGASTCATH         | 5.84E+00                     |
| 20 | EWS:ERG-fusion(ETS)/CADO_ES1-EWS:ERG-ChIP-Seq(SRA014231)     | ATTCCTGTN            | 5.79E+00                     |
| 21 | TEAD4(TEA)/Tropoblast-Tead4-ChIP-Seq(GSE37350)               | CCWGGGAATGY          | 5.41E+00                     |
| 22 | ELF5(ETS)/T47D-ELF5-ChIP-Seq(GSE30407)                       | ACVAGGAAGT           | 4.87E+00                     |
| 23 | ETV1(ETS)/GIST48-ETV1-ChIP-Seq(GSE22441)                     | AACCGGAAGT           | 4.85E+00                     |
| 24 | AP-1(bZIP)/ThioMac-PU.1-ChIP-Seq(GSE21512)                   | VTGACTCATC           | 4.70E+00                     |
| 25 | GATA(Zf),IR4/iTreg-Gata3-ChIP-Seq(GSE20898)                  | NAGATWNBATCTNN       | 4.68E+00                     |
| 26 | MafK(bZIP)/C2C12-MafK-ChIP-Seq(GSE36030)                     | GCTGASTCAGCA         | 4.62E+00                     |
| 27 | EHF(ETS)/LoVo-EHF-ChIP-Seq(GSE49402)                         | AVCAGGAAGT           | 4.55E+00                     |
| 28 | ZNF322(Zf)/HEK293-ZNF322.GFP-ChIP-Seq(GSE58341)              | GAGCCTGGTACTGWGCCTGR | 4.38E+00                     |
| 29 | Chop(bZIP)/MEF-Chop-ChIP-Seq(GSE35681)                       | ATTGCATCAT           | 4.32E+00                     |
| 30 | CArG(MADS)/PUER-Srf-ChIP-Seq(Sullivan_et_al.)                | CCATATATGGNM         | 4.23E+00                     |

\* Significance P-value < 0.0001 estimated by Homer v4.11. ETS and EWS/FLI1 motifs are highlighted yellow.

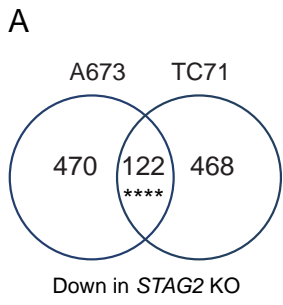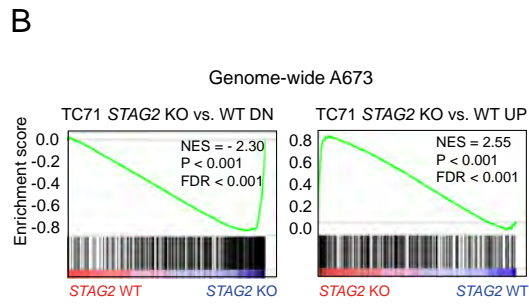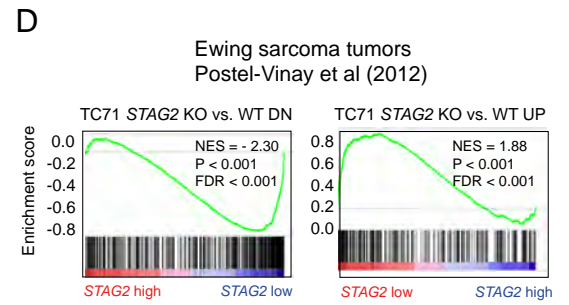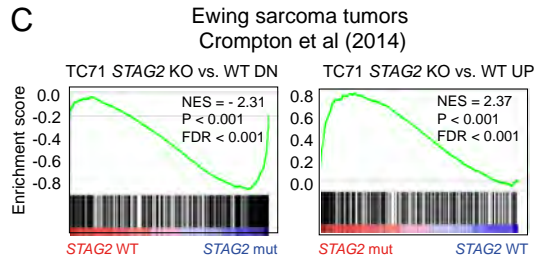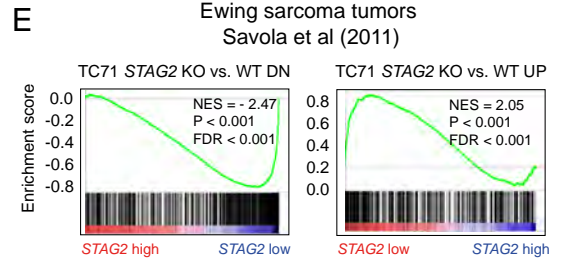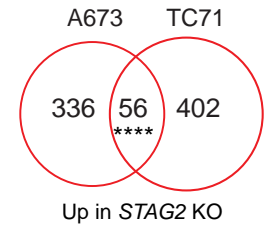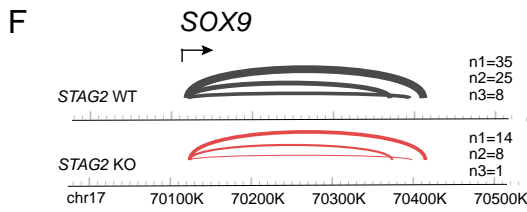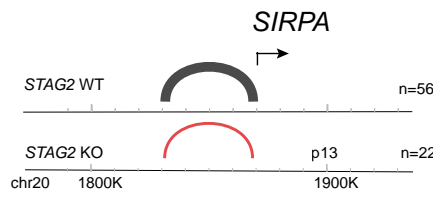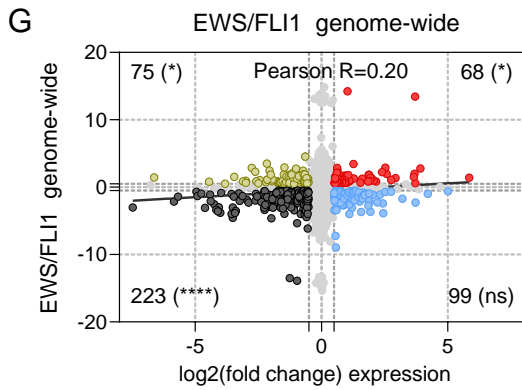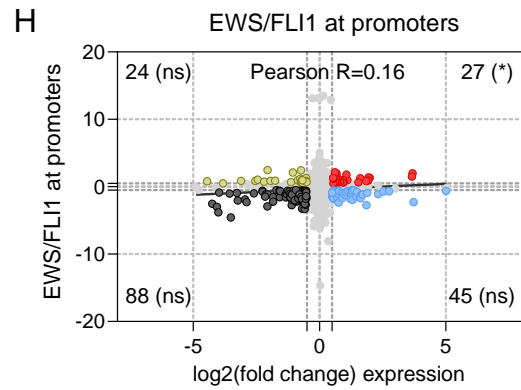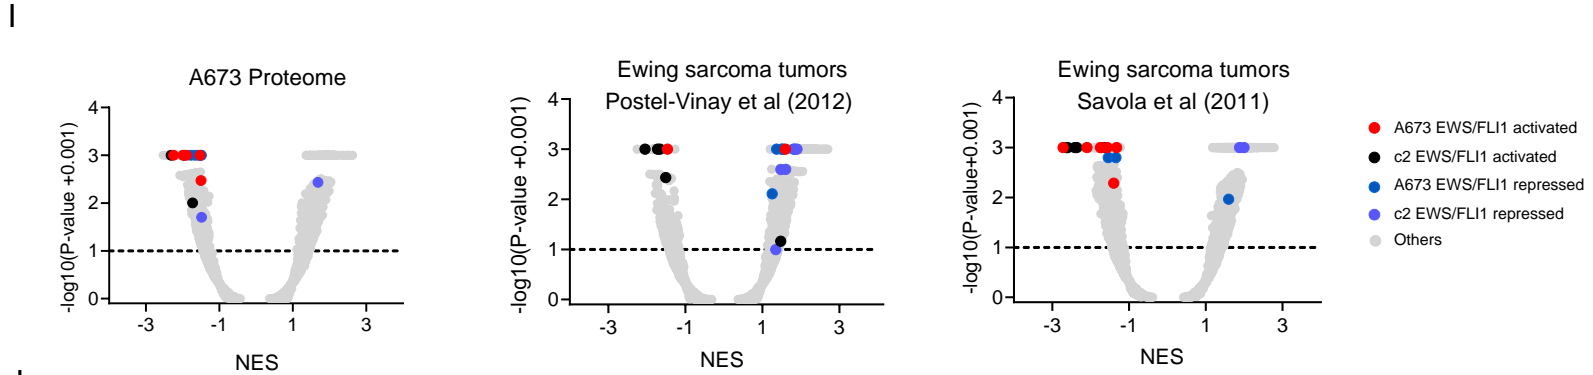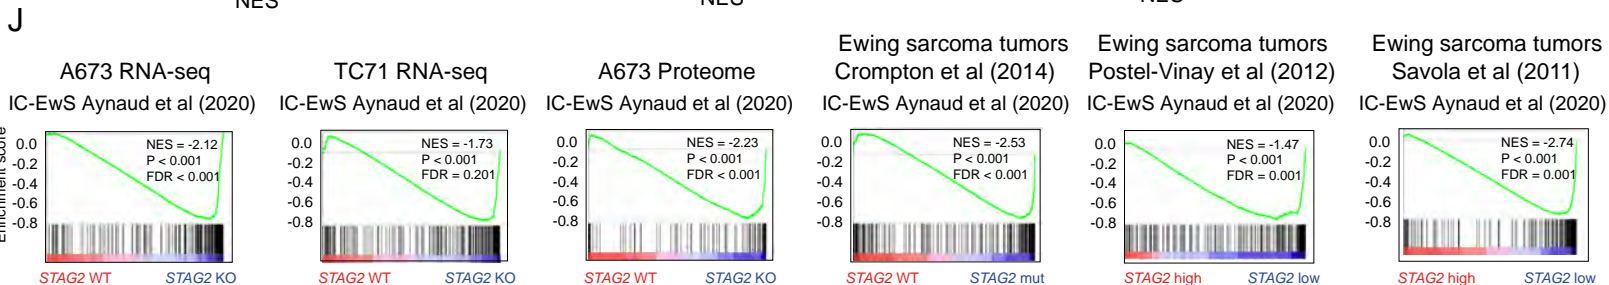



**Figure S4. Loss of *STAG2* alters the EWS/FLI1 driven oncogenic transcriptional program, related to Figure 4.**

(A) Venn diagram showing the overlap between down-regulated and up-regulated differentially expressed genes ( $|\log_2(\text{fold change})| \geq 1.5$ , adjusted  $P \leq 0.10$ ) in *STAG2* KO vs. *STAG2* WT A673 and TC71 cells. Two-tailed Fisher exact test, \*\*\*\*  $P < 0.0001$ .

(B)-(E) GSEA plots demonstrating the enrichment of the *STAG2* KO vs. WT gene signature in TC71 cells ( $|\log_2(\text{fold change})| \geq 1.5$ , adjusted  $P \leq 0.10$ ) in (B) genome-wide mRNA expression signature of *STAG2* KO vs. *STAG2* WT in A673 cells (C) *STAG2* mutant vs. *STAG2* WT primary Ewing sarcoma tumors (Crompton et al., 2014) and *STAG2* low expression vs. *STAG2* high expression tumors in primary Ewing sarcoma tumors (D) (Postel-Vinay et al., 2012) and (E) (Savola et al., 2011).

(F) Diagrams showing the EWS/FLI1 differential loop structures (long interaction arcs connecting anchored regions) at the *SOX9* locus on chromosome 17 and at the *SIRPA* locus on chromosome 20 in WT (black) and *STAG2* KO (red) A673 cells. Numbers on the right show the contact read coverage at loop anchors. Diagrams were created on the WashU Epigenome Browser platform.

(G) Scatter plot depicting the overlap between the 5,192 genes with significant changes induced by *STAG2* KO in A673 cells for EWS/FLI1 ChIP-Seq genome-wide binding ( $\text{abs}(\Delta \text{area under curve signal}) \geq 1.5$ ): decreased (3,714 genes) or increased (1,478 genes) vs. the 984 genes with significant expression changes ( $|\log_2(\text{fold change})| \geq 1.5$ , adjusted  $P \leq 0.10$ ): down-regulated (592 genes), up-regulated (392 genes). Two-tailed Fisher exact test, \*\*\*\*  $P < 0.0001$ , \*  $P < 0.05$ , ns = not significant.

(H) Scatter plot depicting the overlap between the 2,640 genes with EWS/FLI1 ChIP-Seq promoter binding changes induced by *STAG2* KO in A673 cells ( $\text{abs}(\Delta \text{area under curve signal}) \geq 1.5$ ): decreased (2,008 genes) or increased (632 genes) vs. the 984 genes with significant expression changes ( $|\log_2(\text{fold change})| \geq 1.5$ , adjusted  $P \leq 0.1$ ): down-regulated (592

genes), up-regulated (392 genes). Two-tailed Fisher exact test, \*\*\*\* P < 0.0001, \* P < 0.05, ns = not significant.

(I) Volcano plots depicting gene set enrichment analyses for the proteomic expression changes induced by *STAG2* KO vs. WT on A673 cells (left) and *STAG2* low vs *STAG2* high expression in two Ewing tumor expression data sets vs. the union of a collection of 12 EWS/FLI1 gene signatures on A673 cells from published data and MSigDB v7.1 c2 collection (5,529 gene sets). Activated EWS/FLI1 gene signatures are highlighted in red (12 EWS/FLI1 gene sets, compendia collection) and in black (MSigDB c2). Repressed EWS/FLI1 signatures are highlighted in blue (12 EWS/FLI gene sets, compendia collection) and in purple (MSigDB c2).

(J) GSEA plots showing enrichment of the recently generated A673 Ewing sarcoma gene signature IC-EwS (Aynaud et al., 2020) for *STAG2* KO vs. WT in A673 (RNA-Seq and Proteome) and TC71 (RNA-Seq) data, *STAG2* mutant vs *STAG2* WT tumor samples from (Crompton et al., 2014) and *STAG2* low vs. *STAG2* high expression tumor samples from Postel-Vinay et al. (2012) and Savola et al. (2019). Normalized enrichment, P-value and FDR scores are indicated in each plot.

**A** H3K27me3 at SA2/H3K27me3 sites

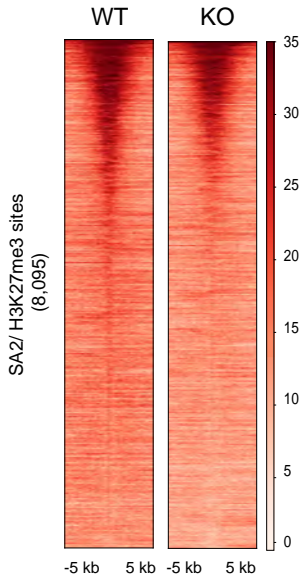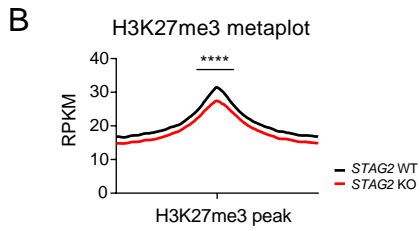

**C** H3K27ac genome-wide

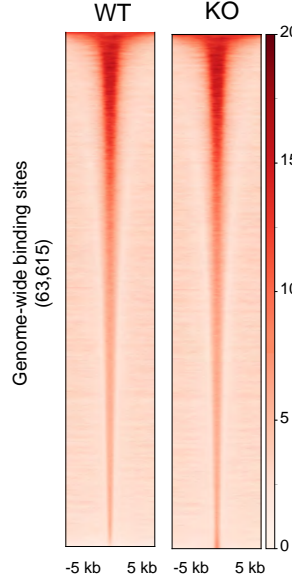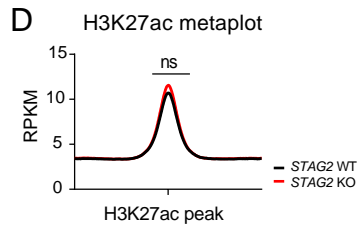

**E** H3K27ac at promoters

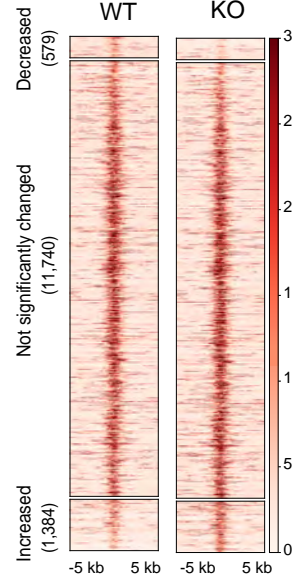

**F** H3K27ac metaplots

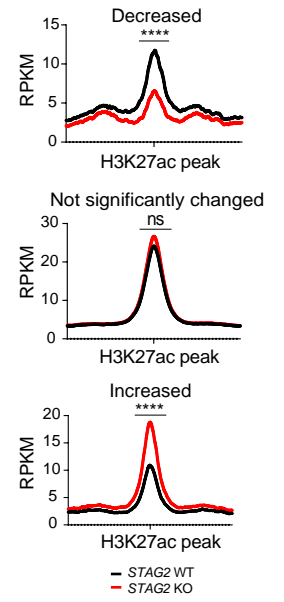

**G** Genes with altered expression

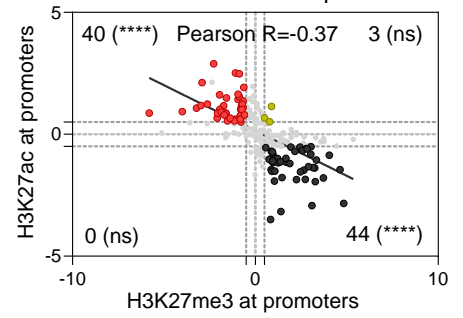

**Figure S5. Loss of *STAG2* perturbs PRC2 mediated regulation of gene expression, related to Figure 5.**

(A) Genome-wide heatmap depicting H3K27me3 signal intensities at the cohesin SA2/H3K27me3 regions defined in Figure 2C in control and *STAG2* KO A673 cells.

(B) Metaplot showing average read density of H3K27me3 signal in *STAG2* WT and KO conditions on A673 cells around peak centered regions defined in Figure S5A. Unpaired t-test with Welch's correction, \*  $P < 0.05$ .

(C) Genome-wide heatmaps of H3K27ac ChIP-Seq signal in A673 cells expressing *STAG2* WT (left) or *STAG2* KO (right) centered on peaks identified in either or both conditions.

(D) Metaplots showing average genome-wide H3K27ac signal in *STAG2* KO and WT A673 cells. Differential read density, unpaired t-test with Welch's correction, \*\*\*\*  $P < 0.0001$ .

(E) Clustered heatmaps depicting TSS +/- 5kb promoter regions with decreased, not significantly changed, or increased H3K27ac ChIP-Seq signal in *STAG2* KO vs. WT A673 cells ( $\text{abs}(\Delta \text{area under curve signal}) \geq 1.5$ ).

(F) Metaplots showing average H3K27ac signal in the promoter regions defined in Figure 5D.

(G) Scatter plot for the synergistic changes of H3K27me3 vs. H3K27ac ChIP-Seq binding signal at the promoter regions in the universe of differentially expressed genes in *STAG2* KO vs. WT A673 cells. Two-tailed Fisher exact test, \*\*\*\*  $P < 0.0001$ , ns = not significant.

**Table S6. Top 30 enriched motifs for the promoters of genes with significantly altered H3K27me3 binding levels induced by STAG2 KO vs. WT in A673 cells, related to Figure 5.**

| #  | Motif Name                                                  | Consensus            | -log <sub>10</sub> (P-value) |
|----|-------------------------------------------------------------|----------------------|------------------------------|
| 1  | Pdx1(Homeobox)/Islet-Pdx1-ChIP-Seq(SRA008281)               | YCATYAATCA           | 9.91E+00                     |
| 2  | PBX2(Homeobox)/K562-PBX2-ChIP-Seq(Encode)                   | RTGATTKATRGN         | 6.84E+00                     |
| 3  | Pit1+1bp(Homeobox)/GCrat-Pit1-ChIP-Seq(GSE58009)            | ATGCATAATTCA         | 6.17E+00                     |
| 4  | EBF2(EBF)/BrownAdipose-EBF2-ChIP-Seq(GSE97114)              | NABTCCCWDGGGAVH      | 6.10E+00                     |
| 5  | AR-halfsite(NR)/LNCaP-AR-ChIP-Seq(GSE27824)                 | CCAGGAACAG           | 6.02E+00                     |
| 6  | EBF(EBF)/proBcell-EBF-ChIP-Seq(GSE21978)                    | DGTCCCYRGGGA         | 5.20E+00                     |
| 7  | HOXB13(Homeobox)/ProstateTumor-HOXB13-ChIP-Seq(GSE56288)    | TTTTATKRGG           | 5.16E+00                     |
| 8  | EWS:ERG-fusion(ETS)/CADO_ES1-EWS:ERG-ChIP-Seq(SRA014231)    | ATTCCTGTN            | 4.91E+00                     |
| 9  | Oct2(POU,Homeobox)/Bcell-Oct2-ChIP-Seq(GSE21512)            | ATATGCAAAT           | 4.89E+00                     |
| 10 | HOXA1(Homeobox)/mES-Hoxa1-ChIP-Seq(SRP084292)               | TGATKGATGR           | 4.89E+00                     |
| 11 | HOXA2(Homeobox)/mES-Hoxa2-ChIP-Seq(Donaldson_et_al.)        | GYCATCMATCAT         | 4.85E+00                     |
| 12 | FOXM1(Forkhead)/MCF7-FOXM1-ChIP-Seq(GSE72977)               | TRTTTACTTW           | 4.50E+00                     |
| 13 | NFAT(RHD)/Jurkat-NFATC1-ChIP-Seq(Jolma_et_al.)              | ATTTTCCATT           | 4.45E+00                     |
| 14 | Pbx3(Homeobox)/GM12878-PBX3-ChIP-Seq(GSE32465)              | SCTGTCAMTCAN         | 4.38E+00                     |
| 15 | CUX1(Homeobox)/K562-CUX1-ChIP-Seq(GSE92882)                 | TATCGATNAN           | 4.16E+00                     |
| 16 | Oct6(POU,Homeobox)/NPC-Pou3f1-ChIP-Seq(GSE35496)            | WATGCAAATGAG         | 3.97E+00                     |
| 17 | Hoxa13(Homeobox)/ChickenMSG-Hoxa13.Flag-ChIP-Seq(GSE86088)  | CYHATAAAN            | 3.95E+00                     |
| 18 | Atf4(bZIP)/MEF-Atf4-ChIP-Seq(GSE35681)                      | MTGATGCAAT           | 3.93E+00                     |
| 19 | SCL(bHLH)/HPC7-Scl-ChIP-Seq(GSE13511)                       | AVCAGCTG             | 3.87E+00                     |
| 20 | ZNF652/HepG2-ZNF652.Flag-ChIP-Seq(Encode)                   | TTAACCCTTTVNKKN      | 3.86E+00                     |
| 21 | Pax7(Paired,Homeobox),long/Myoblast-Pax7-ChIP-Seq(GSE25064) | TAATCHGATTAC         | 3.62E+00                     |
| 22 | PBX1(Homeobox)/MCF7-PBX1-ChIP-Seq(GSE28007)                 | GSCTGTCACTCA         | 3.61E+00                     |
| 23 | FOXA1:AR(Forkhead,NR)/LNCAP-AR-ChIP-Seq(GSE27824)           | AGTAAACAAAAAAGAACAND | 3.56E+00                     |
| 24 | DMRT6(DM)/Testis-DMRT6-ChIP-Seq(GSE60440)                   | YDGHTACAWTGTADC      | 3.51E+00                     |
| 25 | NeuroD1(bHLH)/Islet-NeuroD1-ChIP-Seq(GSE30298)              | GCCATCTGTT           | 3.48E+00                     |
| 26 | Tgif1(Homeobox)/mES-Tgif1-ChIP-Seq(GSE55404)                | YTGWCADY             | 3.41E+00                     |
| 27 | ZNF519(Zf)/HEK293-ZNF519.GFP-ChIP-Seq(GSE58341)             | GAGSCCGAGC           | 3.38E+00                     |
| 28 | FoxL2(Forkhead)/Ovary-FoxL2-ChIP-Seq(GSE60858)              | WWTRTAAACAVG         | 3.36E+00                     |
| 29 | Chop(bZIP)/MEF-Chop-ChIP-Seq(GSE35681)                      | ATTGCATCAT           | 3.36E+00                     |
| 30 | Six1(Homeobox)/Myoblast-Six1-ChIP-Chip(GSE20150)            | GKVTCADRRTWC         | 3.35E+00                     |

\* Significance P-value < 0.0001 estimated by Homer v4.11. The motifs shown in Figure 5H are highlighted yellow.

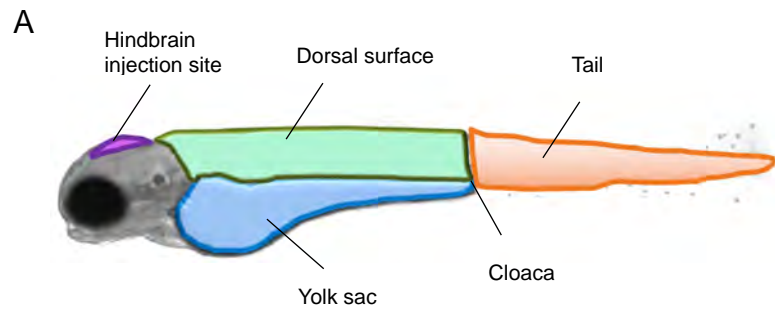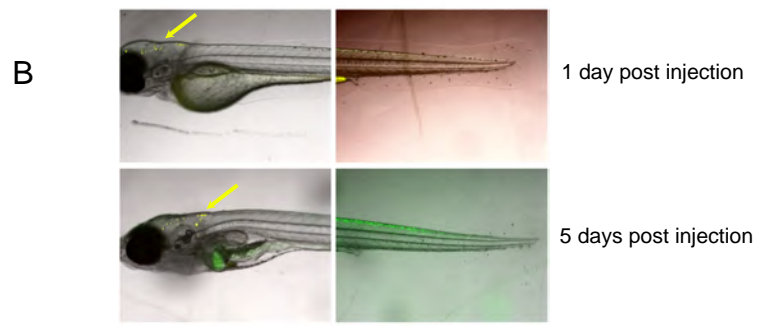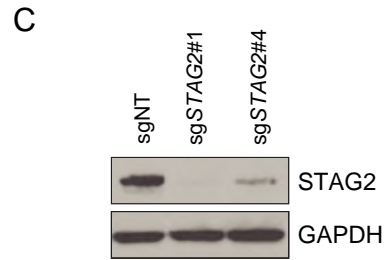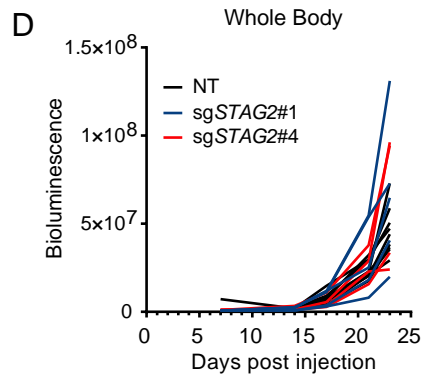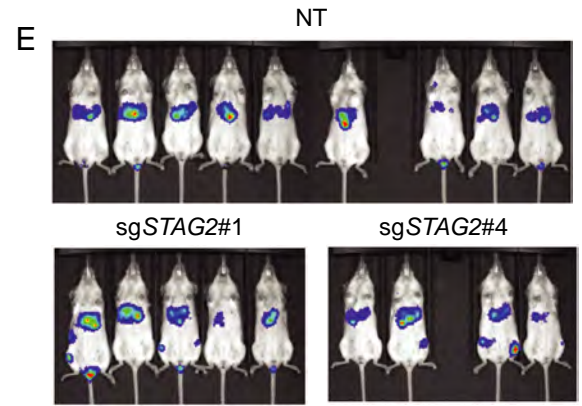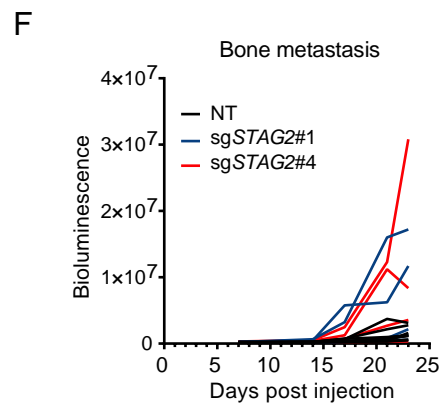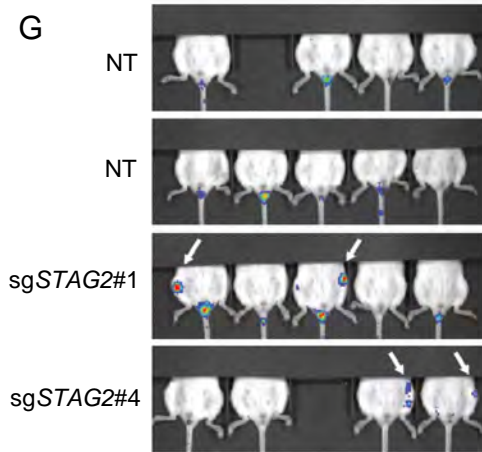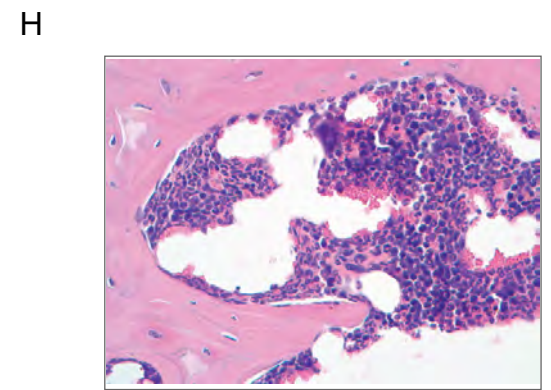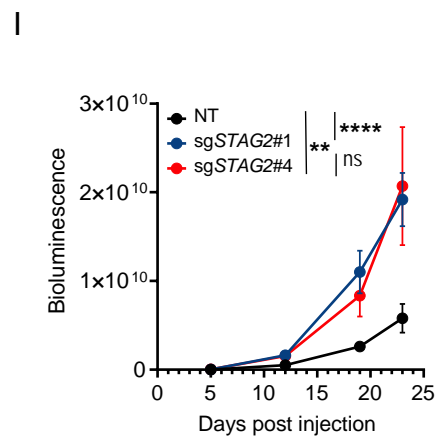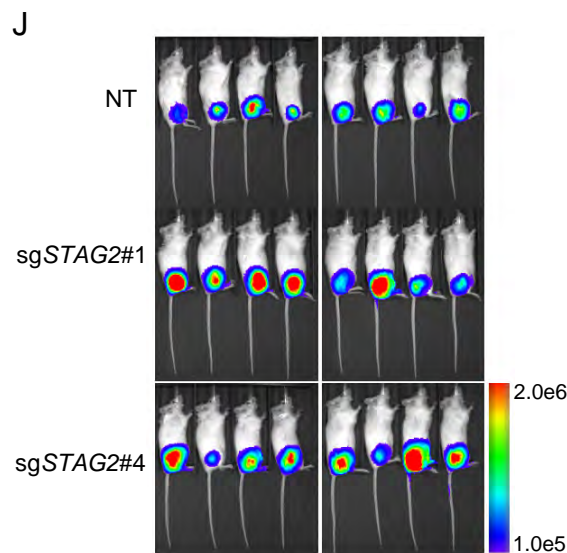

K

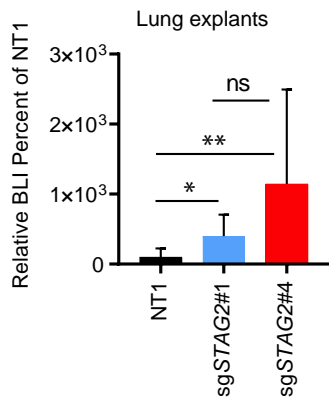

L

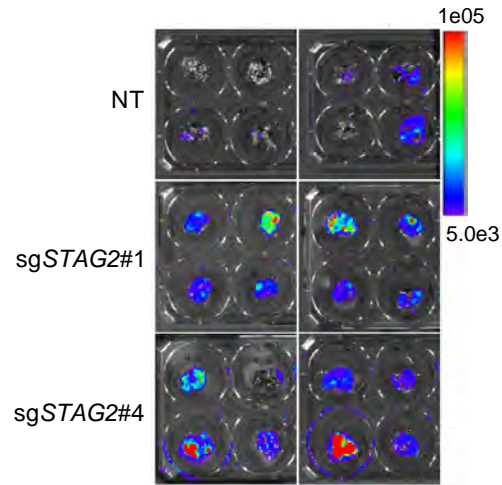

M

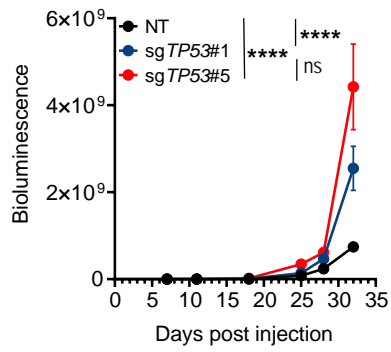

N

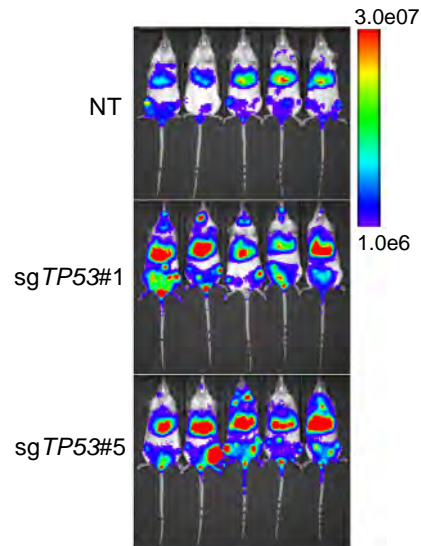

O

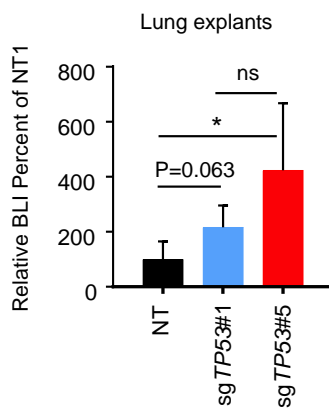

P

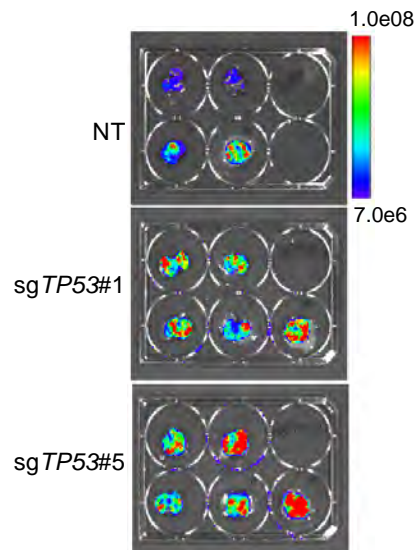

**Figure S6. Depletion of *STAG2* enhances the migration and metastatic potential of Ewing sarcoma cells, related to Figure 6.**

(A) Diagram describing the anatomical locations used for injection (hindbrain region) and the assessment of migration (dorsal surface, tail and yolk sac).

(B) Larvae were injected with fluorescent microspheres (~10 microns in size, yellow dots) into the hind brain ventricles 2 days post fertilization (dpf). Larvae were monitored for passive microsphere migration into the dorsal surface, yolk sac and tail. Images show representative zebrafish at days 1 (top) and 5 (bottom) post injection

(C) Western blot showing the levels of *STAG2* in polyclonal control and *STAG2* KO TC71 cells. *GAPDH* was used as a loading control.

(D) Polyclonal control and *STAG2* KO TC71 cells were injected via tail vein of recipient NSG mice. Quantification of bioluminescence signal collected for whole body is shown. Each line of the spaghetti plot represents a single mouse. N = 8 for NT and N = 4 for sg*STAG2*#1 and sg*STAG2*#4.

(E) Bioluminescence images of mice described in Figure S6D are shown.

(F) Polyclonal control and *STAG2* KO TC71 cells were injected via tail vein of recipient NSG mice. Quantification of bioluminescence signal collected for lower extremities after blocking upper abdominal cavity is shown. Each line of the spaghetti plot represents a single mouse. N = 8 for NT and N = 4 for sg*STAG2*#1 and sg*STAG2*#4.

(G) Bioluminescence images of mice described in Figure S6F are shown. White arrows indicate marrow infiltration of Ewing sarcoma cells.

(H) A representative H&E stained bone marrow of a mouse injected with *STAG2* KO cells is shown.

(I) Clonally selected control (NT) and *STAG2* KO A673 cells were injected into the lower leg intramuscular space of recipient NSG mice. Quantification of bioluminescence signal collected for whole body is shown. Line graph represents mean  $\pm$  SEM, N = 8 per group. Two-way ANOVA, \*\*\*\* P < 0.0001, \*\* P < 0.01, ns = not significant.



(J) Bioluminescence images of lungs described in Figure S6I are shown.

(K) Clonally selected control and *STAG2* KO A673 cells were injected into the lower leg intramuscular space of recipient NSG mice. Lungs were extracted from mice at the conclusion of the study and imaged *ex vivo*. Quantification of bioluminescence signal for lungs normalized to NT signal is shown. Bar graphs represents mean  $\pm$  standard deviation, N = 8 per group. Mann-Whitney non-parametric t-test, \*\* P < 0.001, \* P < 0.05, ns = not significant.

(L) Bioluminescence images of lung explants described in Figure S6K are shown.

(M) Polyclonal control and *TP53* KO TC32 cells were injected via tail vein of recipient NSG mice. Quantification of bioluminescence signal collected for whole body is shown. Line graph represents mean  $\pm$  SEM, N = 5 per group. Two-way ANOVA, \*\*\*\* P < 0.0001, ns = not significant.

(N) Bioluminescence images of mice described in Figure S6M are shown.

(O) Lungs were extracted from mice described in Figures S6M and S6N at the conclusion of the study and imaged *ex vivo*. Quantification of bioluminescence signal for lungs normalized to NT signal is shown (left). Bar graphs represents mean  $\pm$  SD, N = 8 per group. Mann-Whitney non-parametric t-test, \* P < 0.05, ns = not significant. Bioluminescence images of lungs described are shown (right).

(P) Bioluminescence images of lung explants described in Figure S6O are shown.

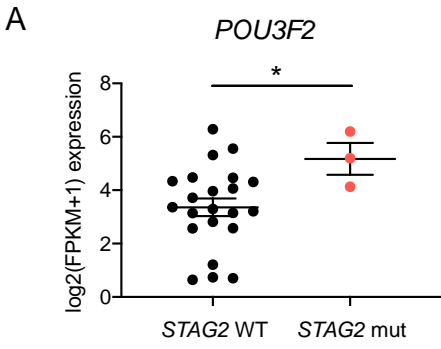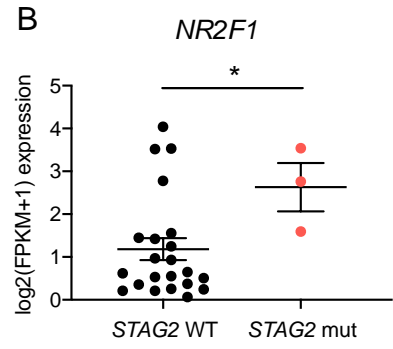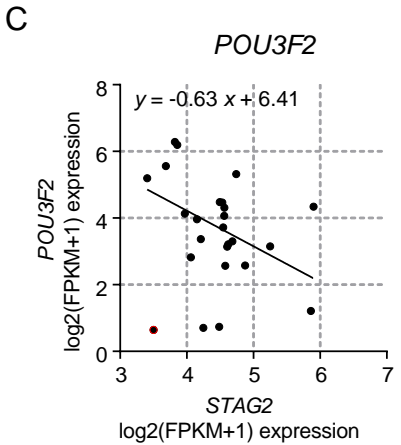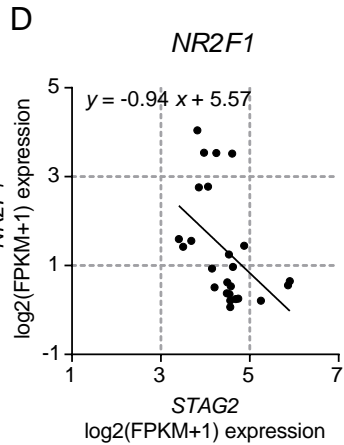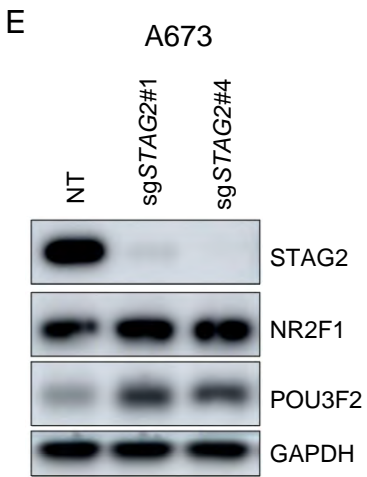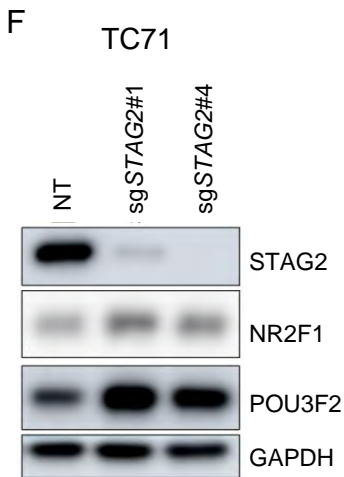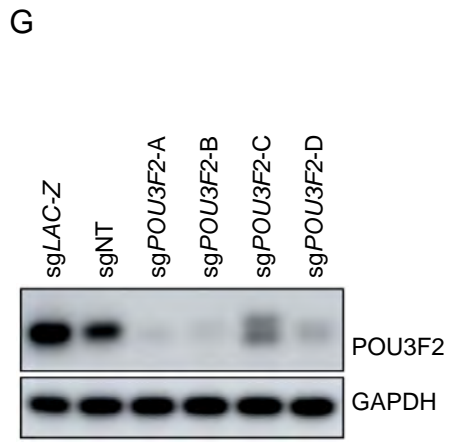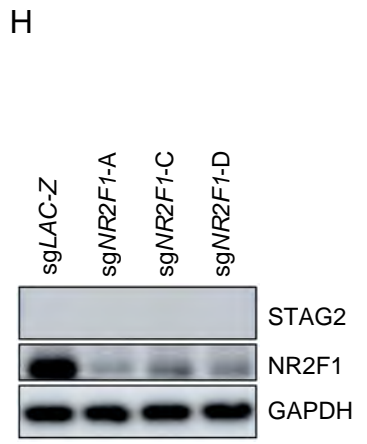

**Figure S7. The neurodevelopmental transcription factor *POU3F2* modulates the metastatic potential of *STAG2* KO Ewing sarcoma cells, related to Figure 7.**

(A)-(B) mRNA log<sub>2</sub>(FPKM+1) expression level of (A) *POU3F2* and (B) *NR2F1* in 3 *STAG2* mutant and 22 *STAG2* WT tumors from Crompton et al. (2014). Mann-Whitney non-parametric t-test, \* P < 0.05.

(C)-(D) Linear regression model fit for the log<sub>2</sub>(FPKM+1) expression of (C) *POU3F2* and (D) *NR2F1* vs. the log<sub>2</sub>(FPKM+1) *STAG2* expression in Ewing tumors from Crompton et al. (2014) is shown. Goodness-of-fit and the Kolmogorov-Smirnov normality test for residuals, \*\* P < 0.01, \* P < 0.05.

(E) Polyclonal *STAG2* KO A673 cells were generated using CRISPR/Cas9 mediated genome editing. The expression levels of *STAG2*, *POU3F2* and *NR2F1* in control (NT) and *STAG2* KO cells were assessed by western blotting. GAPDH was used as a loading control.

(F) Polyclonal *STAG2* KO TC71 cells were generated using CRISPR/Cas9 mediated genome editing. The expression levels of *STAG2*, *POU3F2* and *NR2F1* in control (NT) and *STAG2* KO cells were assessed by western blotting. GAPDH was used as a loading control.

(G) Clonally selected *STAG2* KO A673 cells were used to generate polyclonal *POU3F2* KO cells using CRISPR/Cas9 mediated genome editing. The expression levels of *POU3F2* in control (*LAC-Z* and NT) and *POU3F2* KO cells were assessed by western blotting. GAPDH was used as a loading control. sg*LAC-Z* and sg*POU3F2-A* were used for xenograft studies described in Figures 7G-J.

(H) Clonally selected *STAG2* KO A673 cells were used to generate polyclonal *NR2F1* KO cells using CRISPR/Cas9 mediated genome editing. The expression levels of *NR2F1* and *STAG2* in control (sg*LAC-Z*) and KO cells were assessed by western blotting. GAPDH was used as a loading control. sg*LAC-Z* and sg*NR2F1-A* were used for xenograft studies described in Figures 7G-J.
